# Supplementary material for: The explosive radiation of Cheirolophus (Asteraceae, Cardueae) in Macaronesia
Source: PubMed Central journal article supplement (PMC4048045; doi:10.1186/1471-2148-14-118), 2014-06-02

A

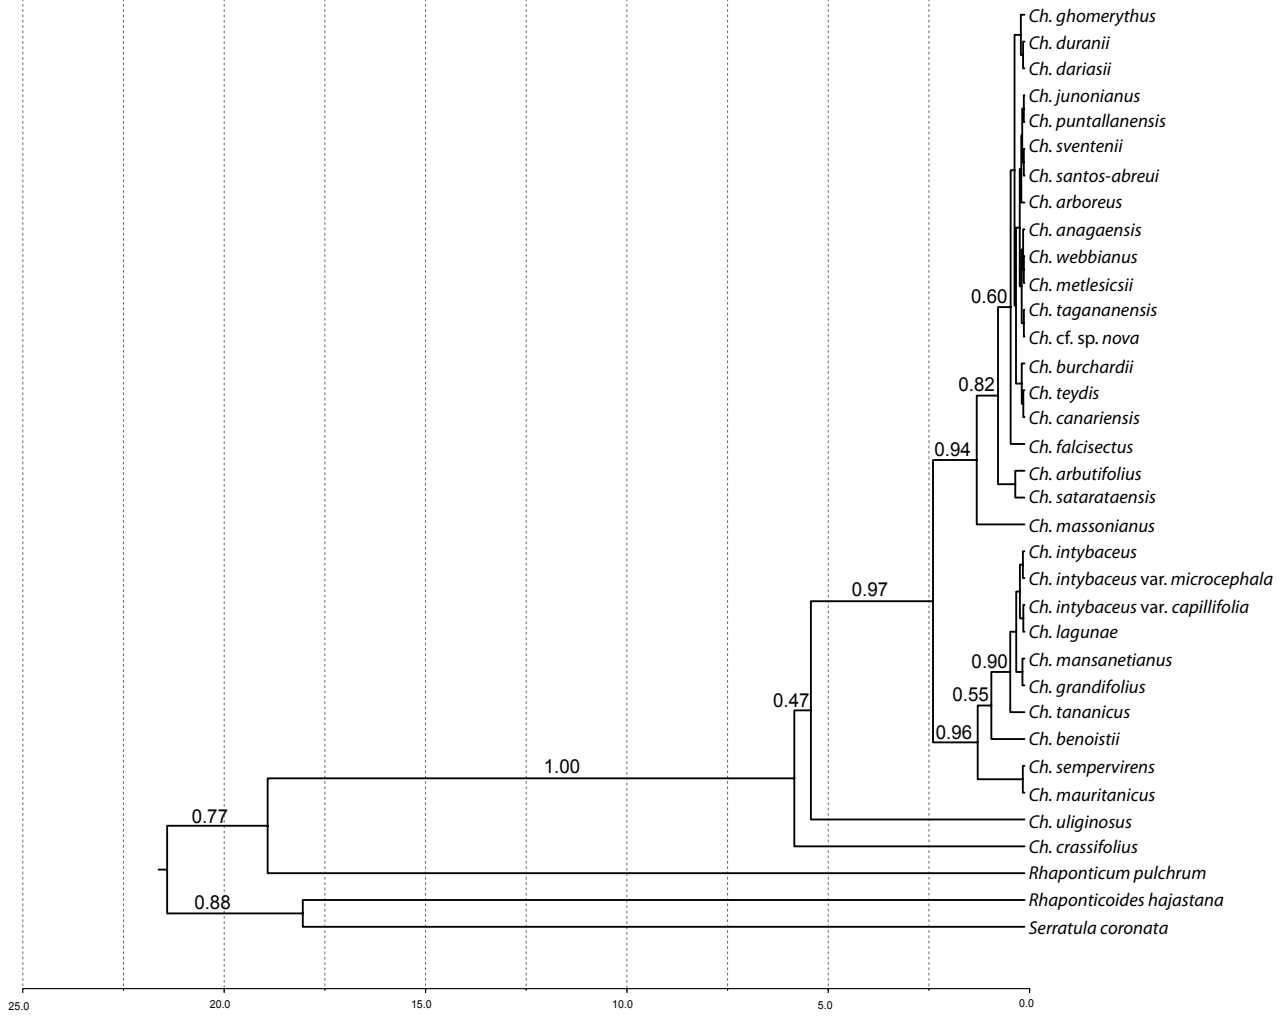

B

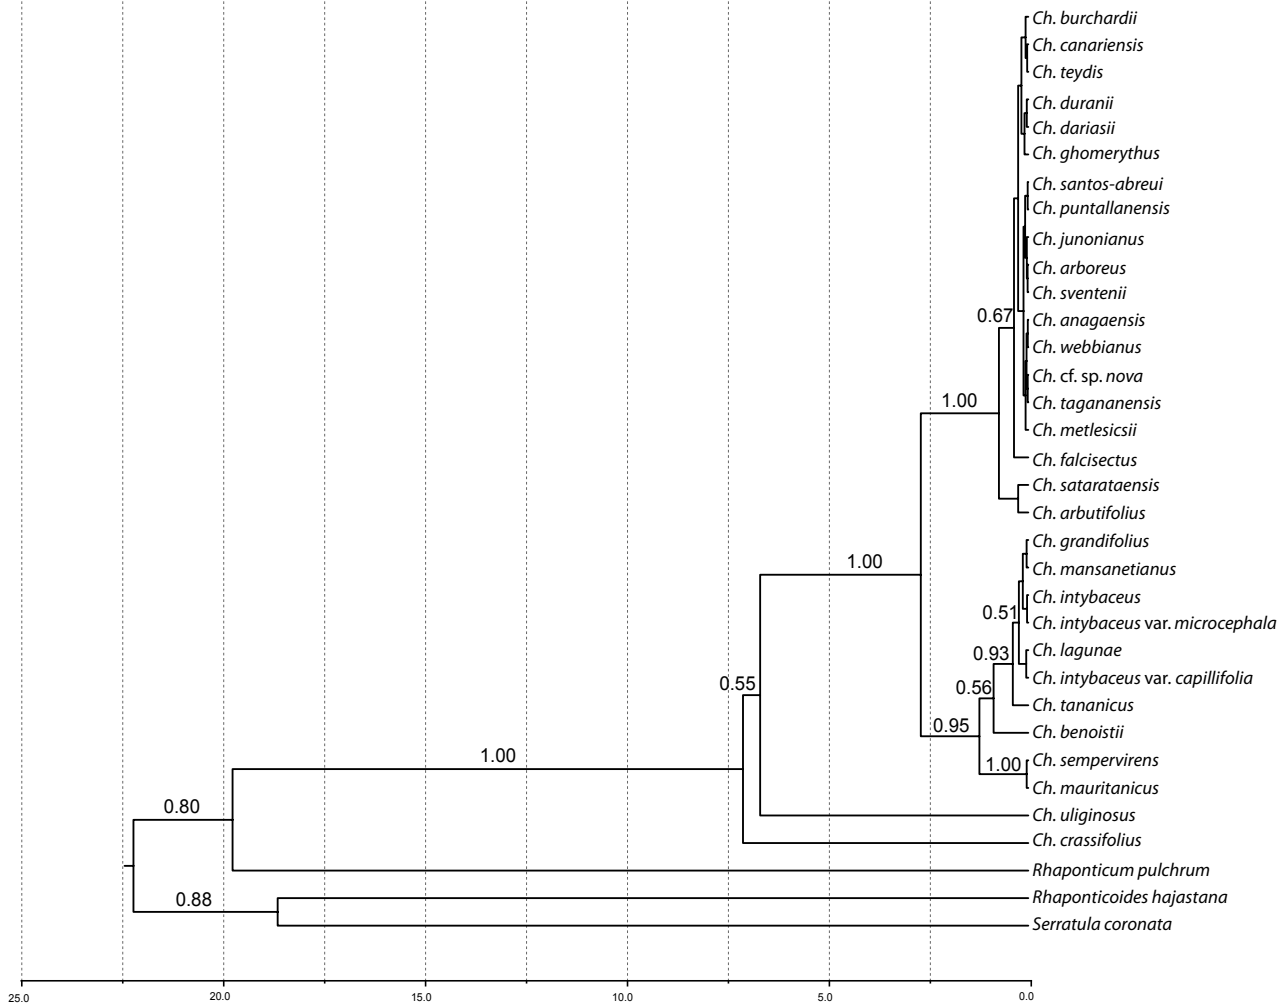

Supplement: 1471-2148-14-118-S4.pdf [file 1471-2148-14-118-S4.pdf]
